# Supplementary material for: Formation of cubic perovskite alloy containing the ammonium cation of 2D perovskite for high performance solar cells with improved stability
Source: Royal Society of Chemistry journal article supplement (doi:10.1039/d1ra04520b), 2021-01-01
Supplement: d1ra04520b1.pdf [file d1ra04520b1.pdf]

# Supporting Information

## Formation of Cubic Perovskite Alloy Containing the Ammonium Cation of 2D perovskite for High Performance Solar Cells with Improved Stability

Mi-Hee Jung<sup>\*,†</sup>

<sup>□</sup>Department of Nanotechnology and Advanced Materials Engineering, Sejong University, 209, Neungdong-ro, Gwangjin-gu, Seoul 05006, Republic of Korea; Fax: +82-2-3408-4342; Tel: +82-2-6935-2597

\*To whom correspondence should be addressed.

E-mail: mhjung@sejong.ac.kr

**Table S1.** Calculated Goldschmidt tolerance factor for alloy perovskites

| <b>Compound</b>                                                           | $r_I/pm$ | $r_{pb}/pm$ | $r_{FA}/pm$ | $r_{MA}/pm$ | $r_{EA}/pm$ | $r_{BA}/pm$ | <b>t factor</b> |
|---------------------------------------------------------------------------|----------|-------------|-------------|-------------|-------------|-------------|-----------------|
| MA <sub>0.67</sub> FA <sub>0.33</sub> PbI <sub>3</sub>                    | 220      | 119         | 253         | 217         |             |             | 0.9363          |
| MA <sub>0.5</sub> FA <sub>0.5</sub> PbI <sub>3</sub>                      | 220      | 119         | 253         | 217         |             |             | 0.9491          |
| MA <sub>0.83</sub> EA <sub>0.17</sub> PbI <sub>3</sub>                    | 220      | 119         |             | 217         | 274         |             | 0.9317          |
| MA <sub>0.65</sub> FA <sub>0.3</sub> EA <sub>0.05</sub> PbI <sub>3</sub>  | 220      | 119         | 253         | 217         | 274         |             | 0.9400          |
| MA <sub>0.53</sub> FA <sub>0.38</sub> EA <sub>0.09</sub> PbI <sub>3</sub> | 220      | 119         | 253         | 217         | 274         |             | 0.9508          |
| MA <sub>0.65</sub> FA <sub>0.30</sub> BA <sub>0.05</sub> PbI <sub>3</sub> | 220      | 119         | 253         | 217         |             | 517         | 0.9653          |

The Goldschmidt tolerance factor, t, defined as follows:  $t = (r_A + r_I) / \sqrt{2}(r_{pb} + r_I)$ , where  $r_A$ ,  $r_{pb}$  and  $r_I$  are the effective radii of cation, Pb<sup>2+</sup> and I<sup>-</sup> ions, respectively. The cation radii in mixed-cation materials were calculated based on a weighted average of the radii of cations

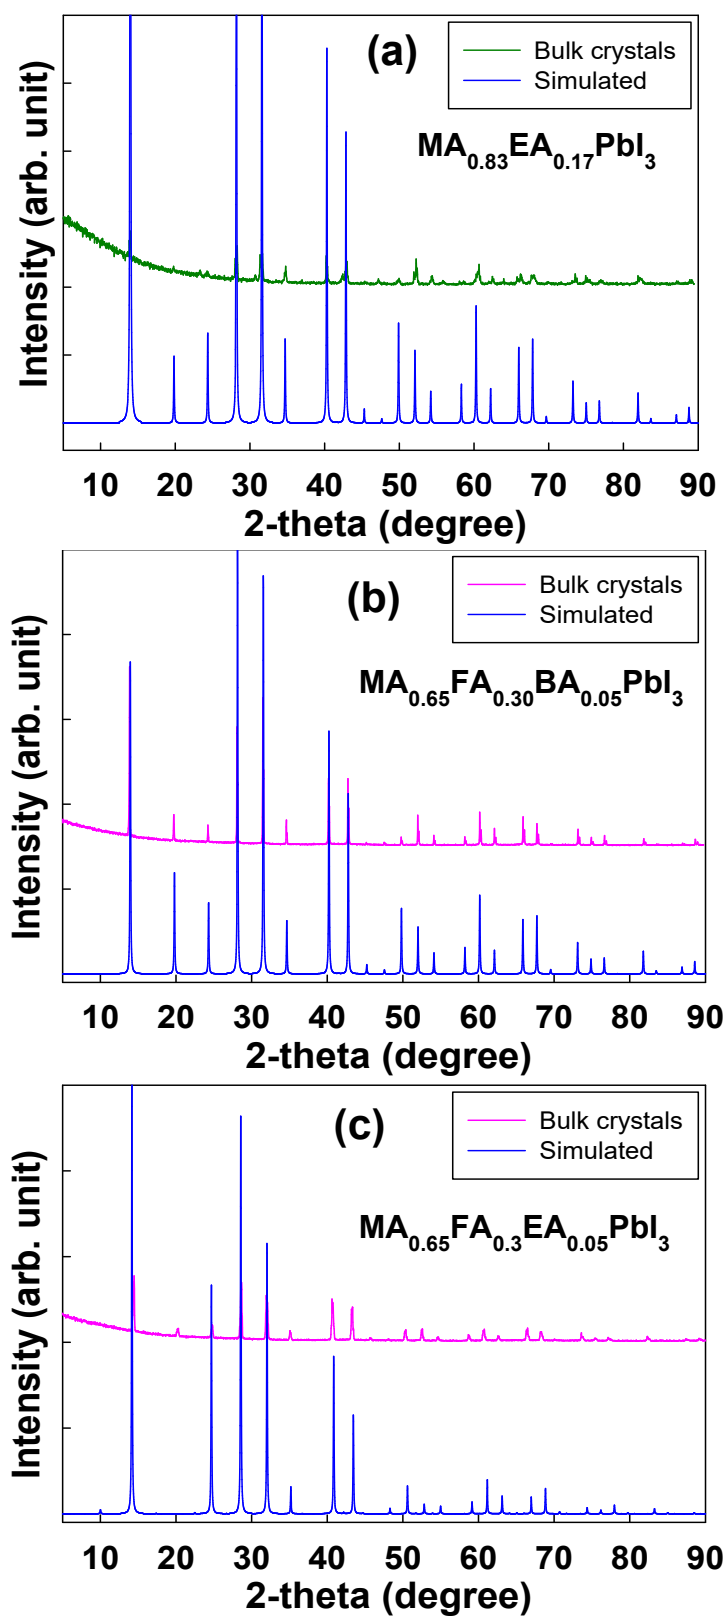

**Figure S1.** Powder X-ray diffraction and the simulated pattern from SCXRD for the  $\text{MA}_{0.83}\text{EA}_{0.17}\text{PbI}_3$ ,  $\text{MA}_{0.65}\text{FA}_{0.30}\text{BA}_{0.05}\text{PbI}_3$  and the  $\text{MA}_{0.65}\text{FA}_{0.3}\text{EA}_{0.05}\text{PbI}_3$  perovskites

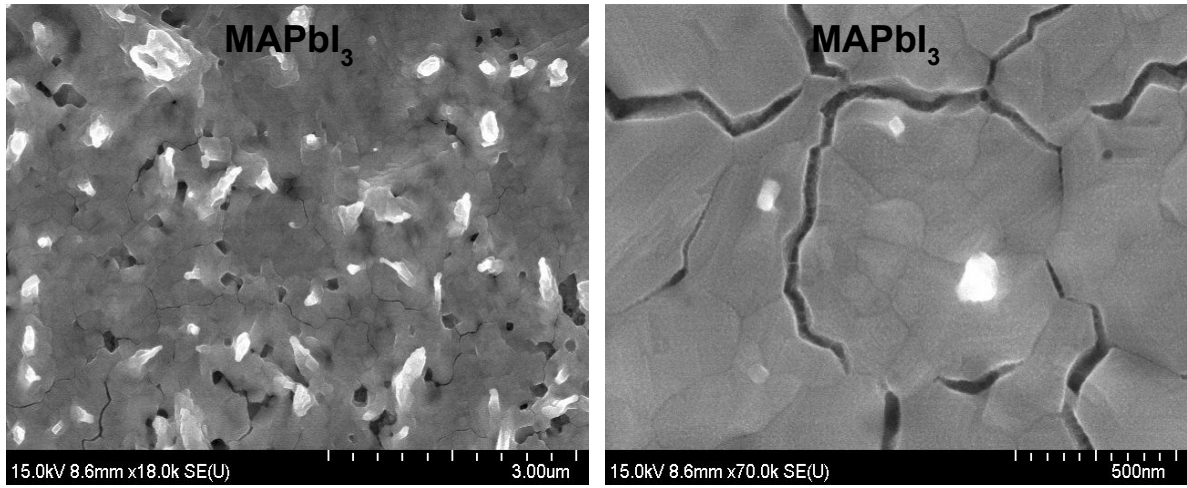

**Figure S2.** The low and high resolution of SEM images of MAPbI<sub>3</sub> perovskite films.
